# Supplementary material for: Evolutionary and functional history of the Escherichia coli K1 capsule
Source: Springer Nature journal article supplement (doi:10.1038/s41467-023-39052-w), 2023-06-15
Supplement: MOESM12 [file 41467_2023_39052_MOESM12_ESM.pdf]

## Evolutionary and functional history of the *Escherichia coli* K1 capsule

Arredondo-Alonso, Sergio; Blundell-Hunter, George; Fu, Zuyi; Gladstone, Rebecca A.; Fillol-Salom, Alfred; Loraine, Jessica; Cloutman-Green, Elaine; Johnsen, Pål J.; Samuelsen, Ørjan; Pöntinen, Anna K.; Cléon, François; Chavez-Bueno, Susana; De la Cruz, Miguel A.; Ares, Miguel A.; Vongsouvath, Manivanh; Chmielarczyk, Agnieszka; Horner, Carlyne; Klein, Nigel; McNally, Alan; Reis, Joice N.

DOI:

[10.1038/s41467-023-39052-w](https://doi.org/10.1038/s41467-023-39052-w)

License:

Creative Commons: Attribution (CC BY)

*Document Version*

Publisher's PDF, also known as Version of record

*Citation for published version (Harvard):*

Arredondo-Alonso, S, Blundell-Hunter, G, Fu, Z, Gladstone, RA, Fillol-Salom, A, Loraine, J, Cloutman-Green, E, Johnsen, PJ, Samuelsen, Ø, Pöntinen, AK, Cléon, F, Chavez-Bueno, S, De la Cruz, MA, Ares, MA, Vongsouvath, M, Chmielarczyk, A, Horner, C, Klein, N, McNally, A, Reis, JN, Penadés, JR, Thomson, NR, Corander, J, Taylor, PW & McCarthy, AJ 2023, 'Evolutionary and functional history of the *Escherichia coli* K1 capsule', *Nature Communications*, vol. 14, no. 1, 3294 . <https://doi.org/10.1038/s41467-023-39052-w>

[Link to publication on Research at Birmingham portal](#)

### General rights

Unless a licence is specified above, all rights (including copyright and moral rights) in this document are retained by the authors and/or the copyright holders. The express permission of the copyright holder must be obtained for any use of this material other than for purposes permitted by law.

- Users may freely distribute the URL that is used to identify this publication.
- Users may download and/or print one copy of the publication from the University of Birmingham research portal for the purpose of private study or non-commercial research.
- User may use extracts from the document in line with the concept of 'fair dealing' under the Copyright, Designs and Patents Act 1988 (?)
- Users may not further distribute the material nor use it for the purposes of commercial gain.

Where a licence is displayed above, please note the terms and conditions of the licence govern your use of this document.

When citing, please reference the published version.

### Take down policy

While the University of Birmingham exercises care and attention in making items available there are rare occasions when an item has been uploaded in error or has been deemed to be commercially or otherwise sensitive.

If you believe that this is the case for this document, please contact [UBIRA@lists.bham.ac.uk](mailto:UBIRA@lists.bham.ac.uk) providing details and we will remove access to the work immediately and investigate.

# Please wait...

If this message is not eventually replaced by the proper contents of the document, your PDF viewer may not be able to display this type of document.

You can upgrade to the latest version of Adobe Reader for Windows®, Mac, or Linux® by visiting [http://www.adobe.com/go/reader\\_download](http://www.adobe.com/go/reader_download).

For more assistance with Adobe Reader visit <http://www.adobe.com/go/acrreader>.

Windows is either a registered trademark or a trademark of Microsoft Corporation in the United States and/or other countries. Mac is a trademark of Apple Inc., registered in the United States and other countries. Linux is the registered trademark of Linus Torvalds in the U.S. and other countries.
